# Supplementary material
Source: MDPI journal article supplement (https://www.mdpi.com/2227-9717/10/8/1610)
Supplement: s1 [file s1]

# Integrated Process for Producing Glycolic Acid from Carbon Dioxide Capture Coupling Green Hydrogen

Dongliang Wang <sup>1,2</sup>, Jingwei Li <sup>1</sup>, Wenliang Meng <sup>1</sup>, Jian Wang <sup>1</sup>, Ke Wang <sup>1</sup>, Huairong Zhou <sup>1,2</sup>, Yong Yang <sup>1,2</sup>, Zongliang Fan <sup>1,2</sup>, Xueying Fan <sup>3</sup>

<sup>1</sup>School of Petrochemical Engineering, Lanzhou University of Technology, Lanzhou 730050, Gansu, China;

<sup>2</sup>Key Laboratory of Low Carbon Energy and Chemical Engineering of Gansu Province, Lanzhou730050, Gansu, China

<sup>3</sup>Automation Institute of Lanzhou Petrochemical Company, Gansu Lanzhou 730050, China

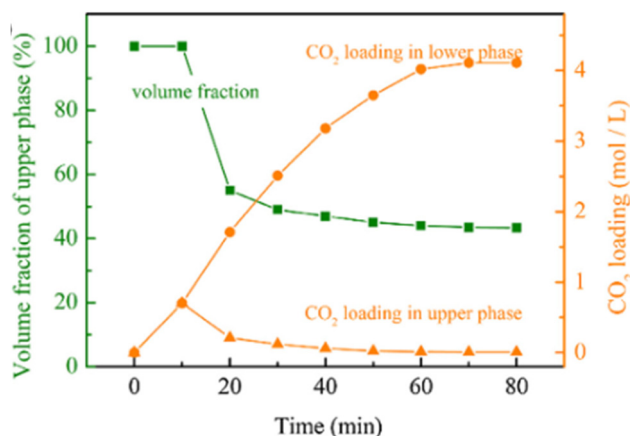

Figure S1. Volume fraction of the upper phase and CO<sub>2</sub> distribution in the 30 wt% MEA/40 wt% 1-propanol biphasic solvent [1]

Table S1. Comparison of the experimental density and the model density of MEA/1-propanol system with different CO<sub>2</sub> loading (at 293 K)

| CO <sub>2</sub> loading (mol/L) | Density (g/ml)    |                    |
|---------------------------------|-------------------|--------------------|
|                                 | Experimental data | Simulation results |
| 0                               | 0.97685           | 0.98036            |
| 0.30                            | 0.99049           | 0.99193            |
| 0.68                            | 1.00722           | 1.00743            |
| 0.88                            | 1.01694           | 1.01466            |
| 1.34                            | 1.03781           | 1.03491            |
| 1.66                            | 1.05227           | 1.04834            |
| 2.02                            | 1.0688            | 1.06239            |
| 2.24                            | 1.0781            | 1.0719             |

Table S2. The flow rate results of the unit of carbon capture

| Stream                          | 1     | 2       | 3       | 4       | 5       | 6       |
|---------------------------------|-------|---------|---------|---------|---------|---------|
| T (°C)                          | 42    | 25      | 28      | 56      | 62.88   | 40      |
| P (bar)                         | 1     | 1       | 1       | 1       | 1       | 1       |
| Mole flow rate (kmol/h)         |       |         |         |         |         |         |
| H <sub>2</sub> O                | 1680  | 51060.1 | 45846.8 | 27946.2 | 22665.3 | 62.333  |
| N <sub>2</sub>                  | 31160 |         | 0.21007 |         |         |         |
| O <sub>2</sub>                  | 1320  |         | 0.01731 |         |         |         |
| CO <sub>2</sub>                 | 5840  | 0.00115 | 4.41295 | 51.9507 | 5257.15 | 5256.74 |
| MEA                             |       | 10786.3 | 213.249 | 108.459 | 0.00102 |         |
| C <sub>3</sub> H <sub>8</sub> O |       | 11481.6 | 7292.33 | 574.489 | 563.316 | 16.268  |
| MEA <sup>+</sup>                |       | 632.388 | 5854.56 | 5668.01 |         |         |
| MEACOO <sup>-</sup>             |       | 617.039 | 5213.93 | 5155.13 |         |         |
| HCO <sub>3</sub> <sup>-</sup>   |       | 3.61343 | 602.693 | 509.451 |         |         |
| CO <sub>3</sub> <sup>2-</sup>   |       | 1.56348 | 18.9693 | 8.75931 |         |         |

Table S3. Reaction kinetic parameter of  $k_1$ ,  $k_2$  and  $k_3$ 

| Term  | Pre-exponential factor $A_i$ (kmol·kgcat <sup>-1</sup> ·s·Pa <sup>-n</sup> ) | Activation energy $E_i$ (KJ·mol <sup>-1</sup> ) |
|-------|------------------------------------------------------------------------------|-------------------------------------------------|
| $k_1$ | 4.0638×10 <sup>-6</sup>                                                      | 11.695                                          |
| $k_2$ | 9.0421×10 <sup>8</sup>                                                       | 11.286                                          |
| $k_3$ | 1.5188×10 <sup>-33</sup>                                                     | 266.01                                          |

$$\ln(K_{eq}) = A + \frac{B}{T} + C \times \ln T + D \times T + \frac{E(P - P_{ref})}{P_{ref}}$$

Table S4. Constants for driving force (adsorption data from [2]); and chemical equilibrium data from [3].

| Term             | A       | B     |
|------------------|---------|-------|
| K <sub>1</sub>   | -52.096 | 11840 |
| K <sub>2</sub>   | 5.639   | -5285 |
| K <sub>3</sub>   | -46.457 | 6555  |
| K <sub>CO</sub>  | -23.20  | 14225 |
| K <sub>CO2</sub> | -22.48  | 9777  |

Table S5.  $K_i$  factors for adsorption term (terms 2, 3, 5 from [2]; rest is explicitly derived by calculation).

| Term | Expression                             | $a_i$                        | $b_i$                    | $\Pi_{C_j}^{vi}$          |
|------|----------------------------------------|------------------------------|--------------------------|---------------------------|
| 1    | 1                                      | $a_1=1$                      | $b_1=0$                  | $\sqrt{f_{H_2}}$          |
| 2    | $\frac{K_{H_2O}}{\sqrt{K_H}}$          | $a_2=4.3676 \times 10^{-12}$ | $b_2=1.1508 \times 10^5$ | $f_{H_2O}$                |
| 3    | $K_{CO}$                               | $a_3=8.3965 \times 10^{-11}$ | $b_3=1.1827 \times 10^5$ | $f_{CO} \sqrt{f_{H_2}}$   |
| 4    | $\frac{K_{CO} K_{H_2O}}{\sqrt{K_H}}$   | $a_4=3.6673 \times 10^{-22}$ | $b_4=2.3335 \times 10^5$ | $f_{CO} f_{H_2O}$         |
| 5    | $K_{CO_2}$                             | $a_5=1.7214 \times 10^{-10}$ | $b_5=8.1287 \times 10^4$ | $f_{CO_2} \sqrt{f_{H_2}}$ |
| 6    | $\frac{K_{CO_2} K_{H_2O}}{\sqrt{K_H}}$ | $a_6=7.5184 \times 10^{-22}$ | $b_6=1.9727 \times 10^5$ | $f_{CO_2} f_{H_2O}$       |
|      |                                        | $A_i=\ln(a_i)$               | $B_i=b_i/R$              | $\Pi_{C_j}^{vi}$          |
| 1    | 1                                      | 0                            | 0                        | $\sqrt{f_{H_2}}$          |
| 2    | $\frac{K_{H_2O}}{\sqrt{K_H}}$          | -26.1568                     | 13842                    | $f_{H_2O}$                |
| 3    | $K_{CO}$                               | -23.2006                     | 14225                    | $f_{CO} \sqrt{f_{H_2}}$   |
| 4    | $\frac{K_{CO} K_{H_2O}}{\sqrt{K_H}}$   | -49.3574                     | 28067                    | $f_{CO} f_{H_2O}$         |
| 5    | $K_{CO_2}$                             | -22.4827                     | 9777                     | $f_{CO_2} \sqrt{f_{H_2}}$ |
| 6    | $\frac{K_{CO_2} K_{H_2O}}{\sqrt{K_H}}$ | -48.6395                     | 23619                    | $f_{CO_2} f_{H_2O}$       |

Table S6. The flow rate results of the unit of CO<sub>2</sub> hydrogenation to methanol

| Stream                  | 1        | 2        | 3         | 4        | 5       | 6       | 7       |
|-------------------------|----------|----------|-----------|----------|---------|---------|---------|
| T (°C)                  | 83.78    | 30.41    | 40.45     | 220      | 80      | 63.57   | 103.73  |
| P (bar)                 | 50       | 50       | 50        | 50       | 1.2     | 1       | 1.2     |
| Mole flow rate (kmol/h) |          |          |           |          |         |         |         |
| CO <sub>2</sub>         | 5256.53  | 8925.99  | 14182.52  | 9031.23  | 14.80   | 8.41    | 0.00    |
| CO                      | 31.89    | 828.72   | 860.61    | 837.13   | 0.00    | 0.00    | 0.00    |
| H <sub>2</sub>          | 16387.13 | 88544.00 | 104931.12 | 89430.31 | 0.00    | 0.00    | 0.00    |
| CH <sub>4</sub> O       | 0.00     | 261.90   | 261.90    | 5436.66  | 5172.12 | 5139.41 | 29.20   |
| H <sub>2</sub> O        | 0.00     | 47.90    | 47.90     | 5199.19  | 5150.81 | 7.44    | 5143.37 |

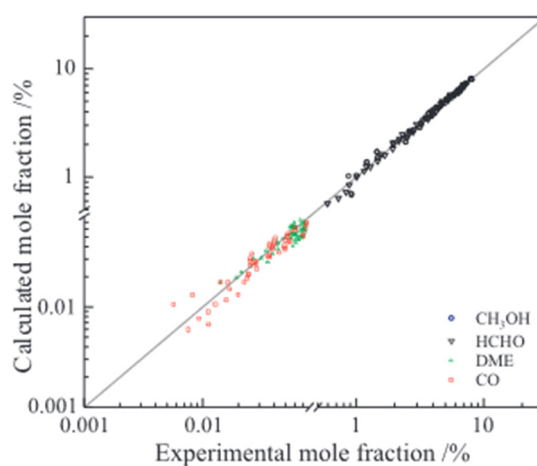

Figure S2. Experimental and calculated values for the fraction of each component [4]

Table S7. The flow rate results of the unit of methanol to formaldehyde

| Stream                          | 1       | 2        | 3        | 4        | 5        | 6        | 7        | 8        |
|---------------------------------|---------|----------|----------|----------|----------|----------|----------|----------|
| T (°C)                          | 25      | 129.81   | 193.85   | 386.42   | 30       | 30       | 42.16    | 32.93    |
| P (bar)                         | 2.16    | 2.16     | 2.16     | 2.16     | 5        | 5        | 5        | 5        |
| Mole flow rate (kmol/h)         |         |          |          |          |          |          |          |          |
| O <sub>2</sub>                  | 0.00    | 34514.00 | 34514.00 | 32035.30 | 0.00     | 32035.30 | 32035.00 | 0.30     |
| CO                              | 0.00    | 0.00     | 0.00     | 5.88     | 0.00     | 5.88     | 5.88     | 0.00     |
| HCHO                            | 0.00    | 0.00     | 0.00     | 4945.63  | 0.00     | 4945.63  | 0.00     | 4945.63  |
| CH <sub>3</sub> OH              | 5139.00 | 5139.00  | 5139.00  | 0.00     | 0.00     | 0.00     | 0.00     | 1.77     |
| C <sub>2</sub> H <sub>6</sub> O | 0.00    | 0.00     | 0.00     | 98.40    | 0.00     | 98.40    | 96.63    | 0.00     |
| H <sub>2</sub> O                | 7.44    | 7.44     | 7.44     | 5062.20  | 10000.00 | 5062.20  | 1896.81  | 13165.39 |
| N <sub>2</sub>                  | 0.00    | 80532.70 | 80532.70 | 80532.70 | 0.00     | 80532.70 | 80532.31 | 0.39     |
| O <sub>2</sub>                  | 0.00    | 34514.00 | 34514.00 | 32035.30 | 0.00     | 32035.30 | 32035.00 | 0.30     |
| CO                              | 0.00    | 0.00     | 0.00     | 5.88     | 0.00     | 5.88     | 5.88     | 0.00     |

Table S8. Solubility of glycolic acid in water

| T/K    | $x_{\text{exp}}$ (mole) | $x_{\text{exp}}$ (mass) |
|--------|-------------------------|-------------------------|
| 257.6  | 0.1931                  | 0.28516                 |
| 263.13 | 0.2151                  | 0.313572                |
| 268.08 | 0.2257                  | 0.327003                |
| 273.83 | 0.2471                  | 0.353621                |
| 278.15 | 0.272                   | 0.383784                |
| 283.05 | 0.2903                  | 0.405416                |
| 288.72 | 0.3214                  | 0.441182                |
| 293.74 | 0.3504                  | 0.47345                 |
| 295.46 | 0.3536                  | 0.476949                |
| 298.77 | 0.3696                  | 0.494262                |
| 303.76 | 0.4147                  | 0.541507                |
| 308.84 | 0.4509                  | 0.577848                |
| 313.51 | 0.4812                  | 0.607245                |

Table S9. The flow rate results of the unit of formaldehyde carbonylation to glycolic acid

| Stream                                           | 1        | 2       | 3       | 4       | 5       | 6       |
|--------------------------------------------------|----------|---------|---------|---------|---------|---------|
| T (°C)                                           | 11.62    | 60      | 60      | 5       | 5       | 15      |
| P (bar)                                          | 3        | 3       | 3       | 1       | 1       | 1       |
| Mole flow rate (kmol/h)                          |          |         |         |         |         |         |
| CO                                               | 4945.63  | 8389.33 | 3443.88 | 0.00    | 0.00    | 0.00    |
| HCHO                                             | 4945.63  | 5038.36 | 126.68  | 0.00    | 0.00    | 0.00    |
| WATER                                            | 13165.39 | 13421.1 | 8541.77 | 6002.87 | 6002.87 | 0.93    |
| OHCH <sub>2</sub> COOH                           | 0.00     | 1.35    | 4819.01 | 6424.45 | 1607.97 | 0.25    |
| Diglycolic acid                                  | 0.00     | 0.00    | 46.21   | 0.00    | 46.21   | 46.21   |
| C <sub>2</sub> H <sub>4</sub> O <sub>3</sub> (S) | 0.00     | 0.00    | 0.00    | 0.00    | 4818.99 | 4818.99 |

Table S10. Temperature parameters for utilities.

| Utilities     | $T_{\text{in}}^{\text{a}}/^{\circ}\text{C}$ | $T_{\text{out}}^{\text{b}}/^{\circ}\text{C}$ |
|---------------|---------------------------------------------|----------------------------------------------|
| Refrigerant 1 | -25.0                                       | -24.0                                        |
| Cooling water | 20.0                                        | 25.0                                         |
| LP steam      | 125.0                                       | 124.0                                        |
| MP steam      | 175.0                                       | 174.0                                        |
| HP steam      | 250.0                                       | 249.0                                        |

<sup>a</sup>  $T_{\text{in}}$  is the supply temperature.<sup>b</sup>  $T_{\text{out}}$  is the target temperature.

Table S11. The parameters of indirect CO<sub>2</sub> emission

| GHG emission            | value | unit                                           |
|-------------------------|-------|------------------------------------------------|
| Wind energy             | 22    | kg/MWh <sub>e</sub>                            |
| coal-fired power        | 832   | g/KWh                                          |
| CO <sub>2</sub> capture | 0.2   | kg CO <sub>2</sub> /kgCO <sub>2</sub> caputred |
| Natural gas extraction  | 4     | kg CO <sub>2</sub> /GJ                         |
| Natural gas combustion  | 0.05  | kg CO <sub>2</sub> /MJ                         |
| Combustion efficiency   | 0.8   |                                                |

Table S12. Input parameters and assumptions for techno-economic analyses.

| Items                           | Values | Units  | Items         | Values | Units                  |
|---------------------------------|--------|--------|---------------|--------|------------------------|
| H <sub>2</sub> O                | 3.56   | CNY/t  | LP steam      | 9.23   | 10 <sup>-6</sup> \$/kJ |
| MEA                             | 9000   | CNY/t  | MP steam      | 12.99  | 10 <sup>-6</sup> \$/kJ |
| C <sub>3</sub> H <sub>8</sub> O | 6500   | CNY/t  | HP steam      | 16.55  | 10 <sup>-6</sup> \$/kJ |
| H <sub>2</sub>                  | 21.93  | CNY/kg | Cooling water | 1.81   | 10 <sup>-6</sup> \$/kJ |
| CO                              | 300    | CNY/t  | Refrigerant 1 | 12.79  | 10 <sup>-6</sup> \$/kJ |
| AIR                             |        |        | Electricity   | 29.28  | 10 <sup>-6</sup> \$/kJ |

## Reference

1. Wang R, Liu S, Wang L, et al. Superior energy-saving splitter in monoethanolamine-based biphasic solvents for CO<sub>2</sub> capture from coal-fired flue gas. *Appl. Energy* **2019**;242:302–10. <https://doi.org/10.1016/j.apenergy.2019.03.138>.
2. An X, Zuo Y, Zhang Q, et al. Methanol synthesis from CO<sub>2</sub> hydrogenation with a Cu/Zn/Al/Zr fibrous catalyst. *Chin. J. Chem. Eng.* **2009**, 17(1): 88–94. [https://doi.org/10.1016/S1004-9541\(09\)60038-0](https://doi.org/10.1016/S1004-9541(09)60038-0).
3. H.W. Lim, M.J. Park, S.H. Kang, H.J. Chae, J.W. Bae, K.W. Jun, Modeling of the kinetics for methanol synthesis using Cu/ZnO/Al<sub>2</sub>O<sub>3</sub>/ZrO<sub>2</sub> catalyst: influence of carbon dioxide during hydrogenation *Ind. Eng. Chem. Res.* **2009** 48:10448–10455. <https://doi.org/10.1021/ie901081f>
4. Shao Q, Chi Z, Li X, et al. Kinetic study and reactor simulation of methanol to formaldehyde over Fe-Mo catalysts *Natural Gas Chem. Ind.* **2021**;46(5):121–8. <https://doi.10.3969/j.issn.1001-9219.2021.05.020>
